# Supplementary material for: Complex relationship between SAPO framework topology, content and distribution of Si and catalytic behaviour in the MTO reaction
Source: Royal Society of Chemistry journal article supplement (doi:10.1039/c7cy01250k), 2017-01-01

## Complex relationship between SAPO framework topology, content and distribution of Si and catalytic behaviour in the MTO reaction

Irene Pinilla-Herrero<sup>1,2</sup>, Carlos Márquez-Álvarez<sup>1</sup>, Enrique Sastre<sup>1</sup>

### Supporting Information

**Table S1.** Weight loss assigned to the removal of organic directing agents in TGA analysis of as-synthesized SAPO materials.

| Sample    | Weight loss TGA<br>(473-1173K) |
|-----------|--------------------------------|
| S35-0.3E  | 15.5                           |
| S35-0.6E  | 15.5                           |
| STA-0.25E | 18.2                           |
| STA-0.6E  | 16.6                           |
| S42-0.34A | 18.8                           |
| S42-0.6A  | 18.7                           |

**FIGURE S1**

**Fig.S1.** Powder X-ray diffraction patterns of the calcined SAPO samples.

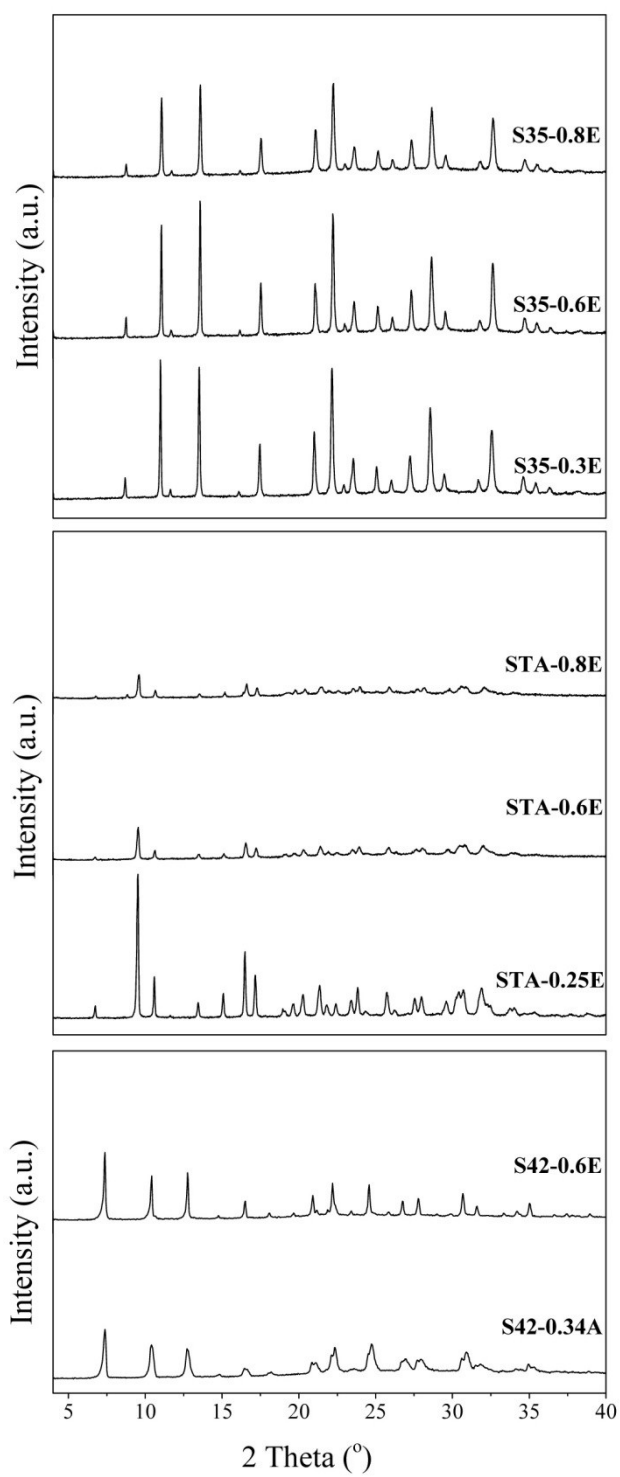

## FIGURE S2

**Fig. S2.**  $^{29}\text{Si}$  CP/MAS NMR spectrum of the sample S42-0.6E after calcination

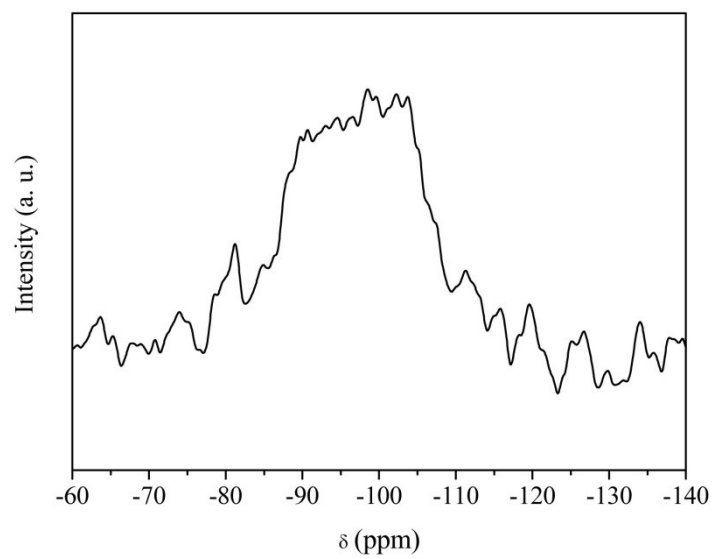

**FIGURE S3**

**Fig. S3.** Selectivity to C2-C4 alkanes obtained in the MTO reaction on SAPO catalysts with different topology and Si content.

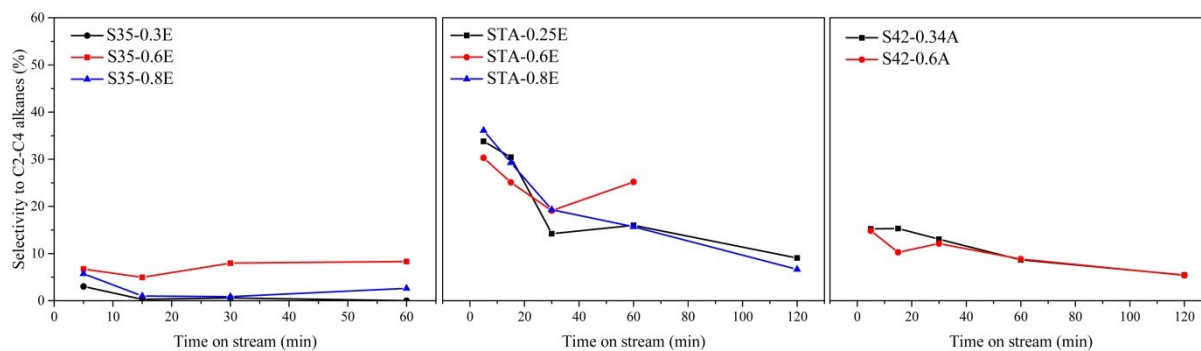

Supplement: c7cy01250k1.pdf [file c7cy01250k1.pdf]
